# Supplementary material for: Constitutive translation of human α-synuclein is mediated by the 5′-untranslated region
Source: PubMed Central journal article supplement (PMC4852460; doi:10.1098/rsob.160022), 2016-04-20
Supplement: rsob160022supp2.pdf [file rsob160022supp2.pdf]

**Table S2**

| Gene description                 | Symbol | Species | Accession Number | Motif position in 5'-UTR <sup>1</sup> | Motif Length | QGRS Mapper Motif <sup>2</sup>            | QGRS Mapper score <sup>3</sup> | Percent inhibition <sup>4</sup> | PubMed ID |
|----------------------------------|--------|---------|------------------|---------------------------------------|--------------|-------------------------------------------|--------------------------------|---------------------------------|-----------|
| Zic family member 1              | ZIC1   | human   | NM_003412.3      | 678                                   | 23           | <u>GGGGGGGGCGGG</u><br><u>GGAGGCCGGGG</u> | 58                             | 74%                             | 18515550  |
| ADAM metalloproteinase domain 10 | ADAM10 | human   | NM_001110.3      | 68                                    | 18           | <u>GGGACGGGTAGG</u><br><u>GGCGGG</u>      | 42                             | 64%                             | 22065584  |
| Cyclin D3                        | CCND3  | human   | NM_001760.4      | 65                                    | 20           | <u>GGGCGGCGGGCG</u><br><u>GGCTGGGG</u>    | 39                             | 53%                             | 22858673  |
| Matrix metalloproteinase 16      | MMP16  | human   | NM_005941.4      | 213                                   | 17           | <u>GGGAGGGAGGGA</u><br><u>GAGGG</u>       | 40                             | 55%                             | 19397366  |
| Alpha synuclein                  | SNCA   | human   | NM_000345.3      | 2                                     | 20           | <u>GGAGAAGGAGAA</u><br><u>GGAGGAGG</u>    | 21                             | 30%                             |           |
| Alpha synuclein                  | SNCA   | human   | NM_000345.3      | 26                                    | 11           | <u>GGAGGAGGAGG</u>                        | 21                             | 29%                             |           |
| Alpha synuclein                  | SNCA   | human   | NM_000345.3      | 53                                    | 18           | <u>GGGGCCCAAGAA</u><br><u>GGGGG</u>       | 12                             | 36%                             |           |

<sup>1</sup>Motif location from start of 5'-UTR.

<sup>2</sup>Predicted motif of G-quadruplex forming sequence according to QGRS Mapper algorithm; no overlaps included, see Kikin et al., 2006 for details.

<sup>3</sup>The QGRS Mapper scoring system evaluates a quadruplex forming G-rich sequences for its likelihood to form a stable G-quadruplex. Higher scoring sequences will make better candidates for G-quadruplex.

<sup>4</sup>Percent inhibition of translation based on G-quadruplex mutagenesis studies using the psiCHECK2 Dual-luciferase reporter assay system.
